# Supplementary material for: PAHs, Physicochemical and Microbiological Analyses of Trout Processed by Traditional Smoking, in Different Types of Packaging
Source: MDPI journal article supplement (doi:10.3390/fishes8080424), 2023-08-19
Supplement: s1 [file s1]

**Supplementary Table S1.** Correlation matrix of 17 parameters with values over the detection threshold (TVB-N = total volatile basic nitrogen, TPC = total plate count, Naph = Naphthalene, Acen = Acenaphtene, Fluo = Fluorene, Phen = Phenanthrene, Anth = Anthracene, Flran = Fluoranthene, Pyre = Pyrene, Baanth = Benzo(a)anthracene, Chry = Chrysene). Significance levels:  $p < 0.001$  '\*\*\*';  $0.001 < p < 0.01$  '\*\*';  $0.01 < p < 0.05$  '\*'

[illegible]
